# Supplementary figures and images for: Characterization of Two Historic Smallpox Specimens from a Czech Museum
Source: MDPI journal article supplement (doi:10.3390/v9080200), 2017-07-27

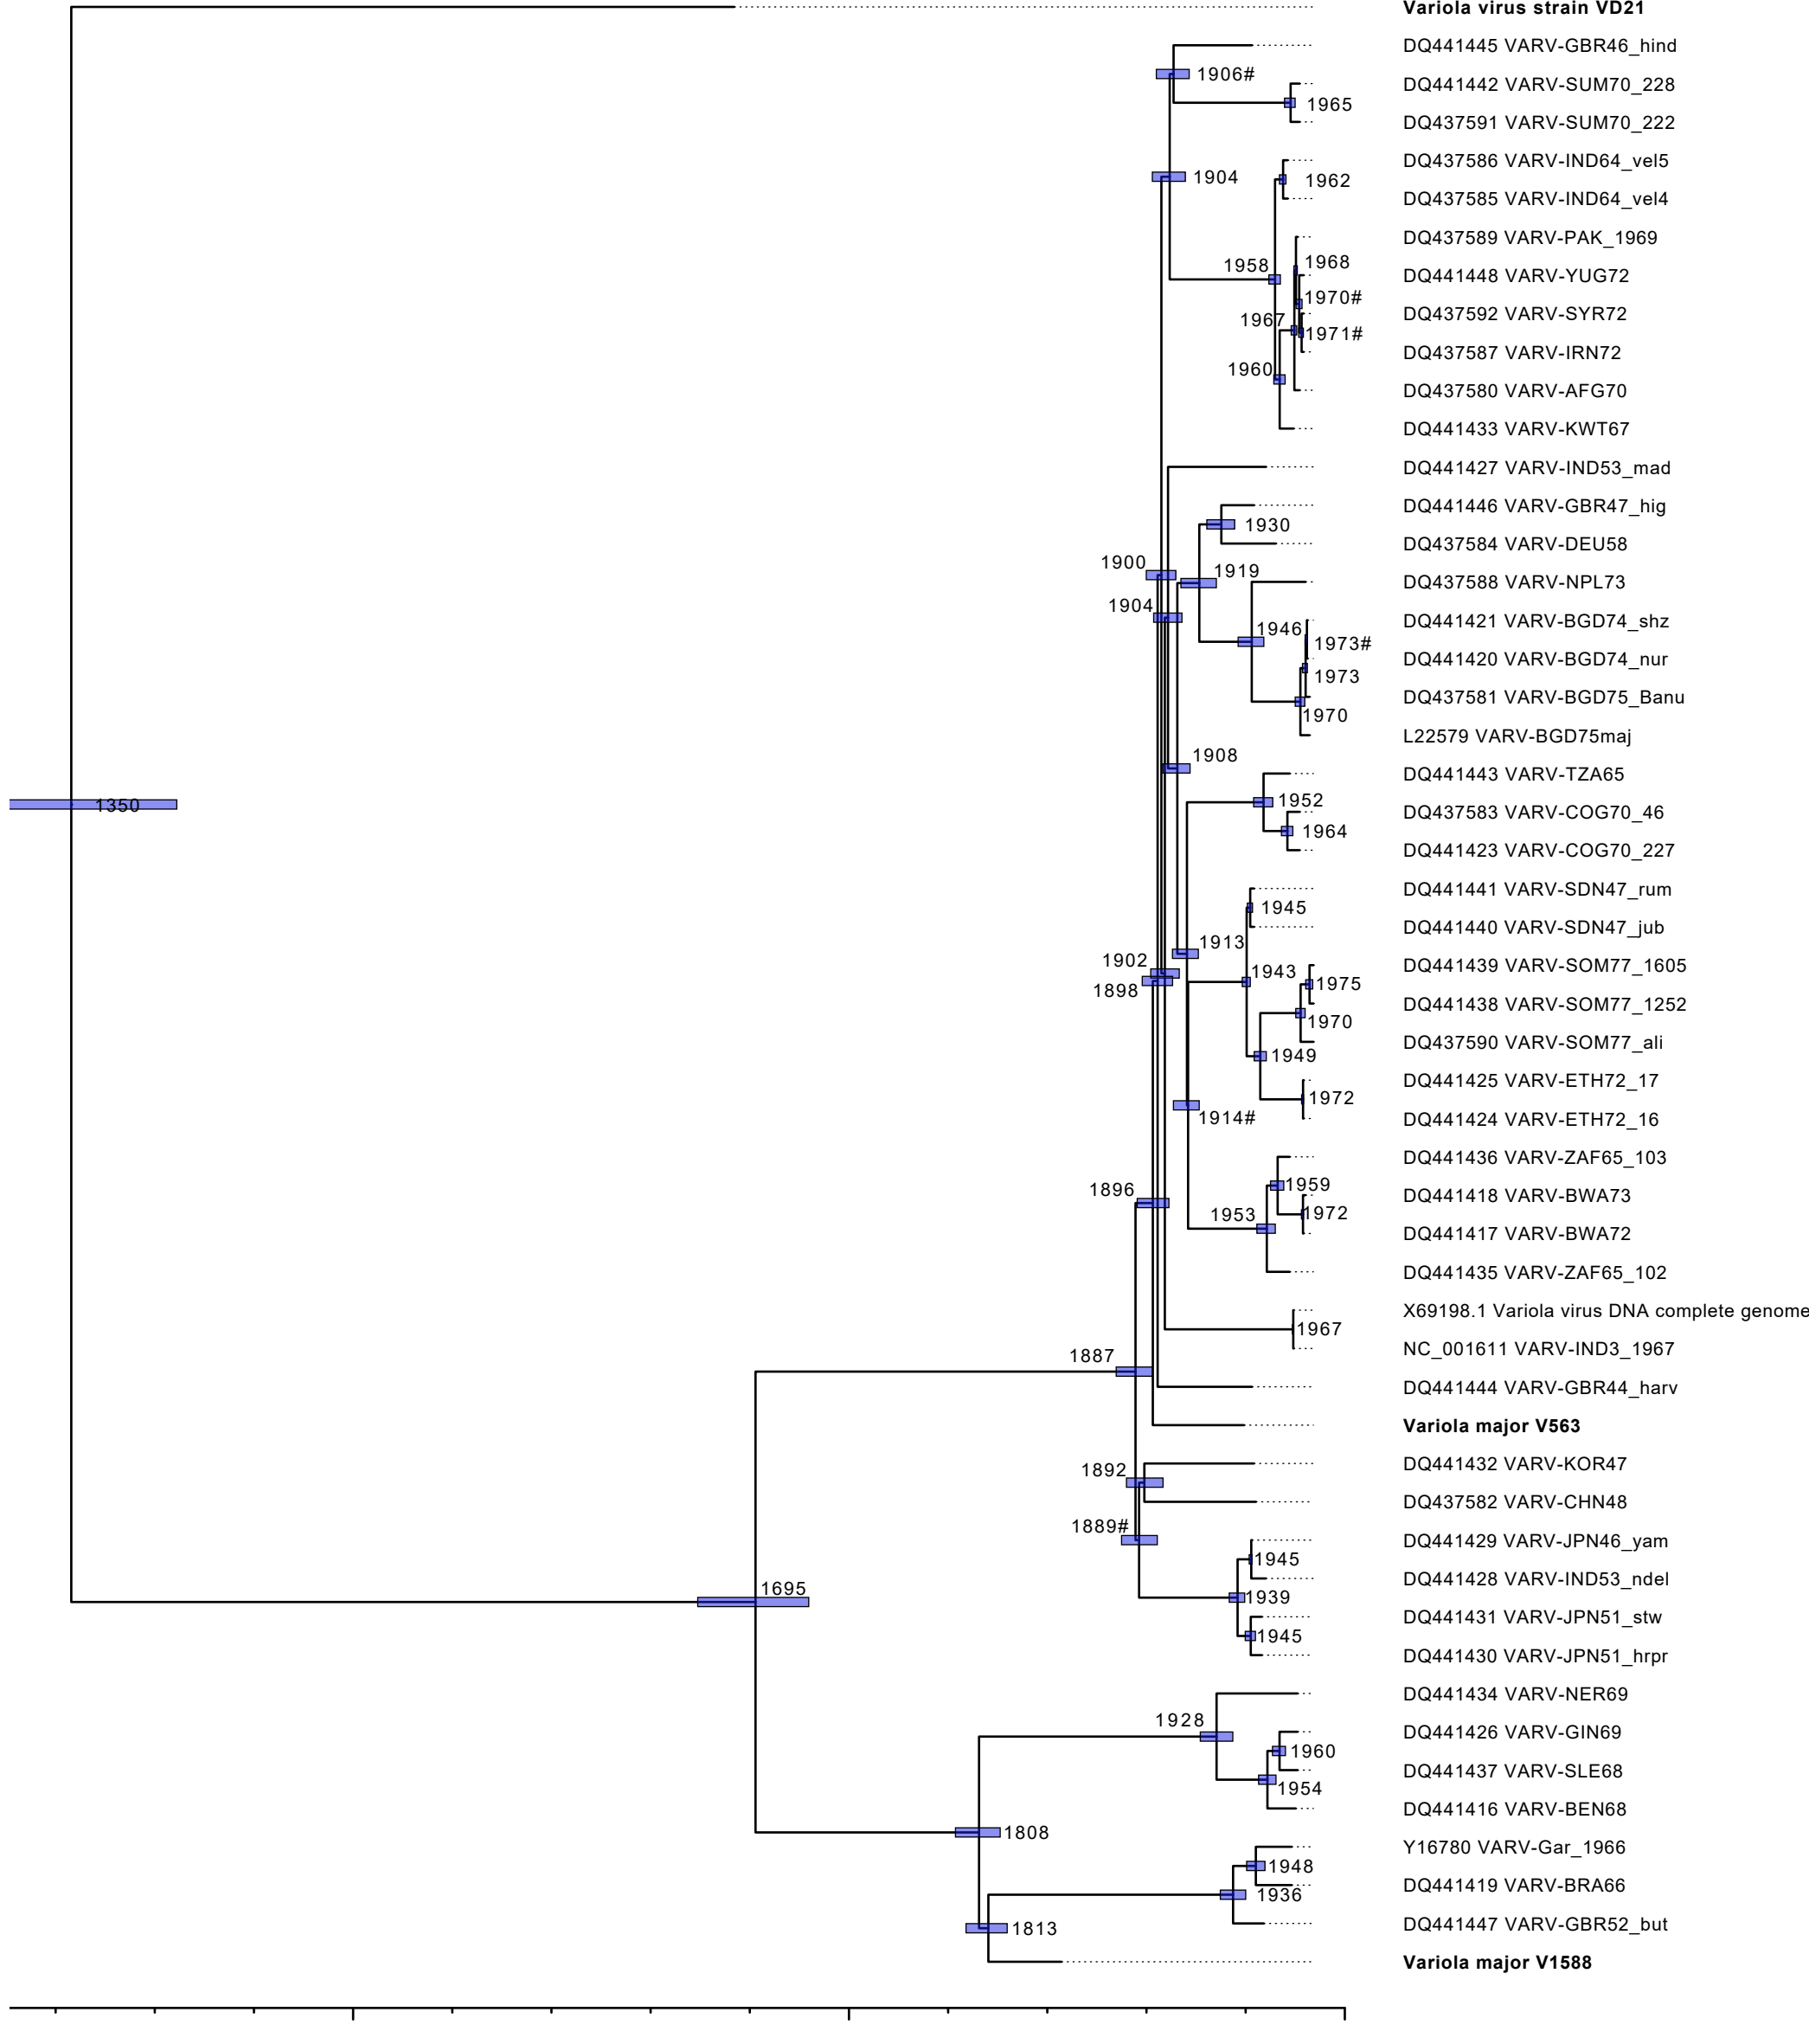

Supplement: s1 [file s1]
